# Supplementary material
Source: PubMed Central journal article supplement (PMC2659192)
Supplement: M808319200_1.pdf [file M808319200_1.pdf]

## Temme et al. Supplemental Fig. 1

**A**

```

1  MSAPRVGGVLAALGATALGAFYLGTHVERERQHNGSTSGLPRLPGLPTFGT  50
51  VSAASLI PAQENNVSLTATPSRIGQIMKYGF PGLDHVRSHSDYVLSYDRR  100
101  NRVPHWVFEHLTAESVAKNDAVDRSKCDFKQDES IHPFFRSQNTDYRRSG  150
151  YDRGHMAAAGNHRLHQKHCDETFYLSNMAPQVGQGFNRDAWNTLEAHVRR  200
201  LTKTYSNVYVCTGPLYLPHKEDDGKSYVKYEVI GANTVAVPPTHFYKVI VG  250
251  ESADHKLHMESYVMPNQVISNDTPISV FQVPPESVERSAGLLFFDQINRK  300
301  QLT TINGKKV
  
```

**B**

```

1  MSKRKAEDTQSDKMA TAEKVAQNDYTIGLV--DPVKDYQKLIETRVQVDEIVDDDV  endoGI 1
192  TTPGELSADDA AALSGEFEATLTKENPLEEYRTL MKRFVLT KIIIVPDSV  endoGI 2

55  TKENFDR TAAAARDV IWRLLFDEAGTSQS NTEKASQLLEEYRGDACFYDPTPYNEW  endoGI 1
241  HQASVKKIAAAAAREI IWKLLFDGTPSAE-DQNKAAELLQ EYKGDAGFYGPDDYNSW  endoGI 2

111  IVKLRDEV LKKE LLDFWRDVLVKKQLG PCWSRDS DLFDSDDT PPLEFYAHAGCTAP  endoGI 1
296  IFNLRDEV LTKEL LD FWRDKMVKMELGP SCARDS DYYDNED PLPFEFYEKAGCKAP  endoGI 2

167  FAASLKVRAALEEQASLDQDGPATP  endoGI 1
352  FEGPVNDD  endoGI 2
  
```

Supplemental Fig.1: (A) Amino acid sequence of endoG with mitochondrial targeting sequence in gray, the active site residues underlined and Asp 187 boxed in grey. (B) Endo GI sequence and tandem repeat structure. The two halves of the endo GI sequence are aligned with each other as indicated by the amino acid numbering. Identical residues are marked in color.

Temme et al. Supplemental Fig. 2

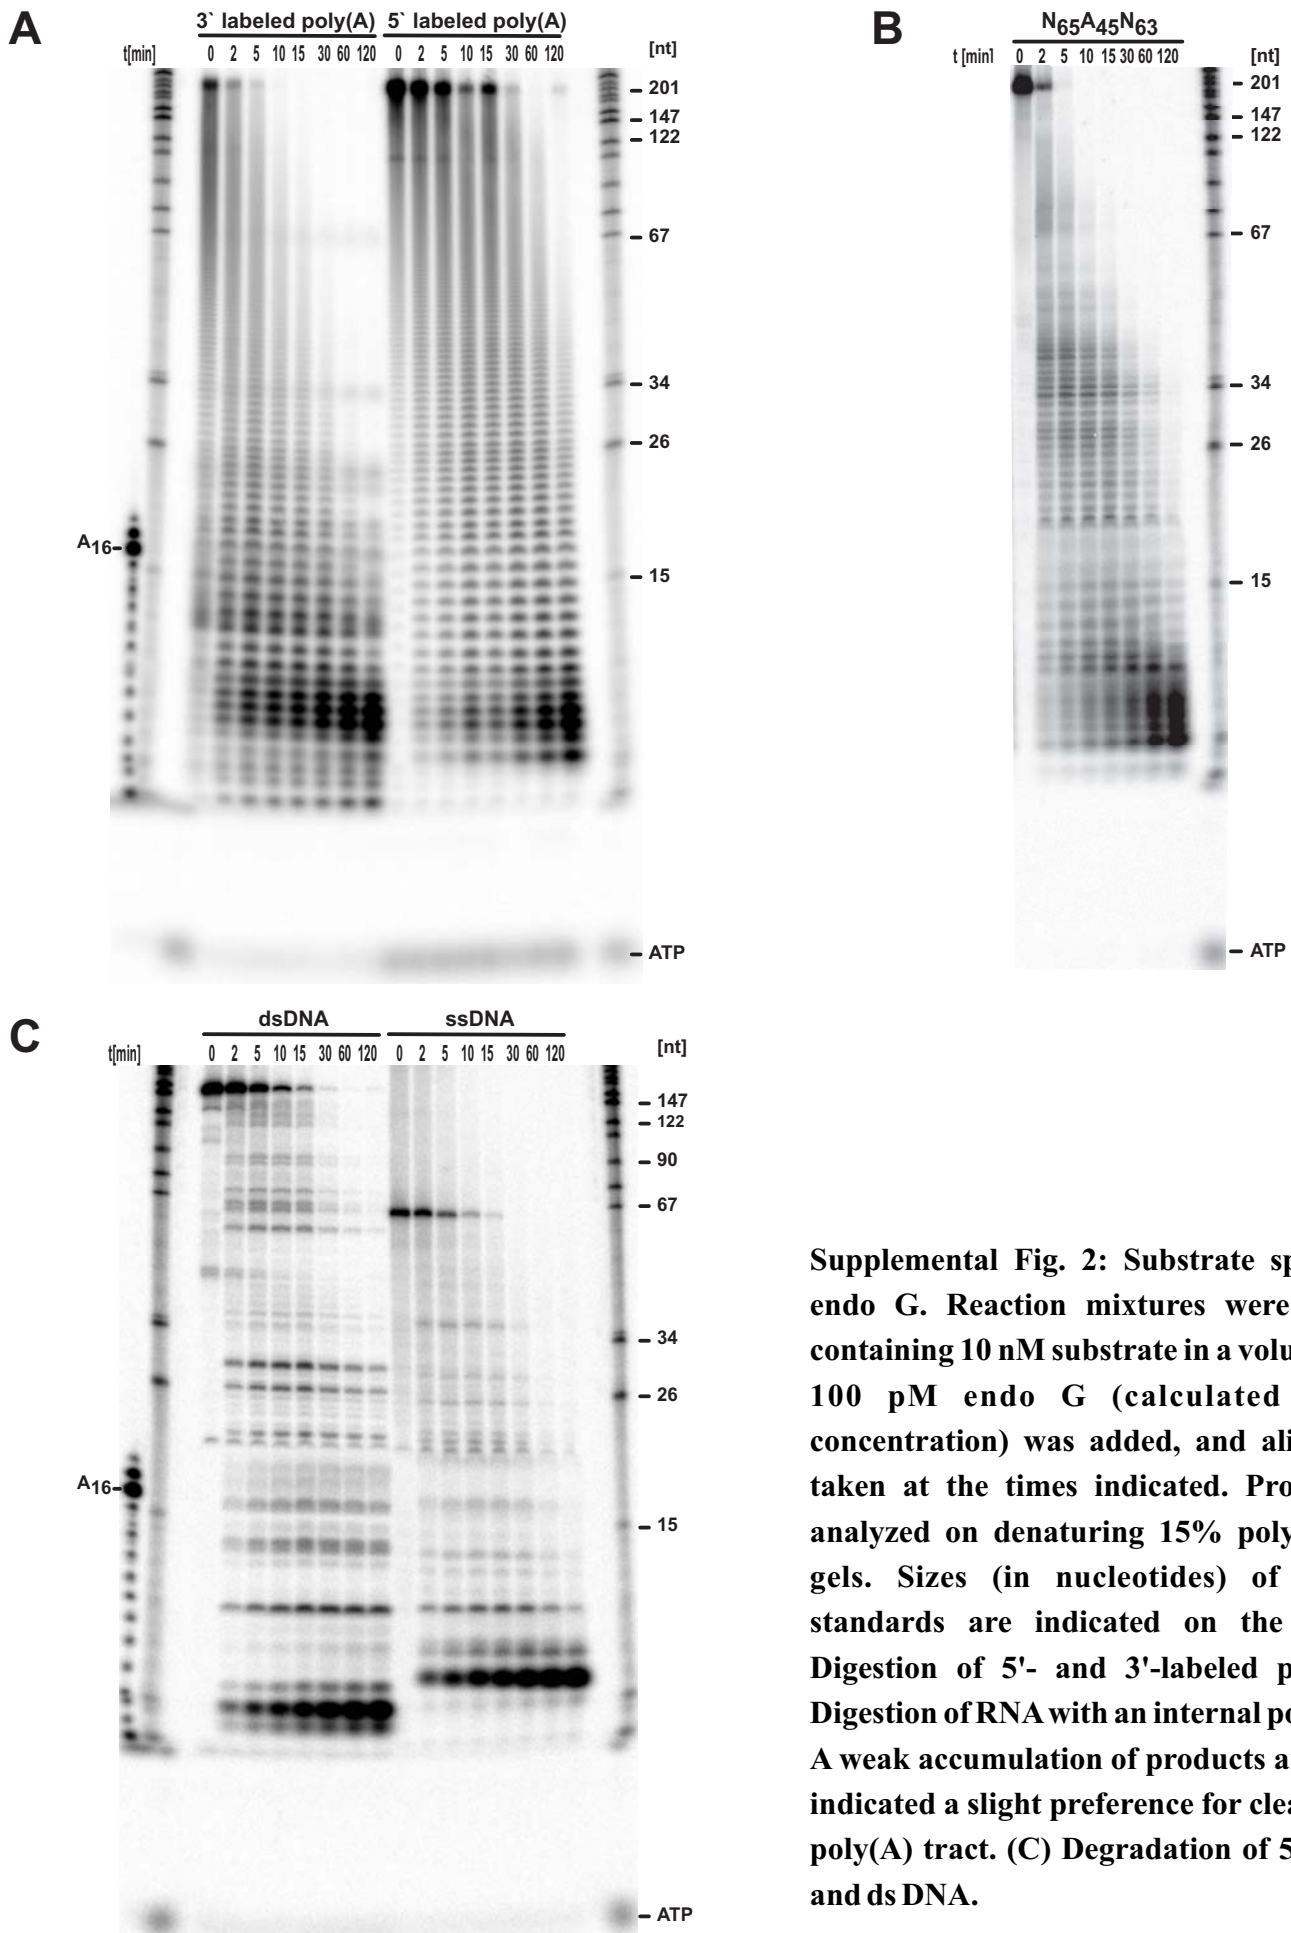

**Supplemental Fig. 2: Substrate specificity of endo G.** Reaction mixtures were assembled containing 10 nM substrate in a volume of 20  $\mu$ l. 100 pM endo G (calculated monomer concentration) was added, and aliquots were taken at the times indicated. Products were analyzed on denaturing 15% polyacrylamide gels. Sizes (in nucleotides) of DNA size standards are indicated on the right. (A) Digestion of 5'- and 3'-labeled poly(A). (B) Digestion of RNA with an internal poly(A) tract. A weak accumulation of products around 65 nt indicated a slight preference for cleavage in the poly(A) tract. (C) Degradation of 5'-labeled ss and ds DNA.

### Temme et al. Supplemental Fig. 3

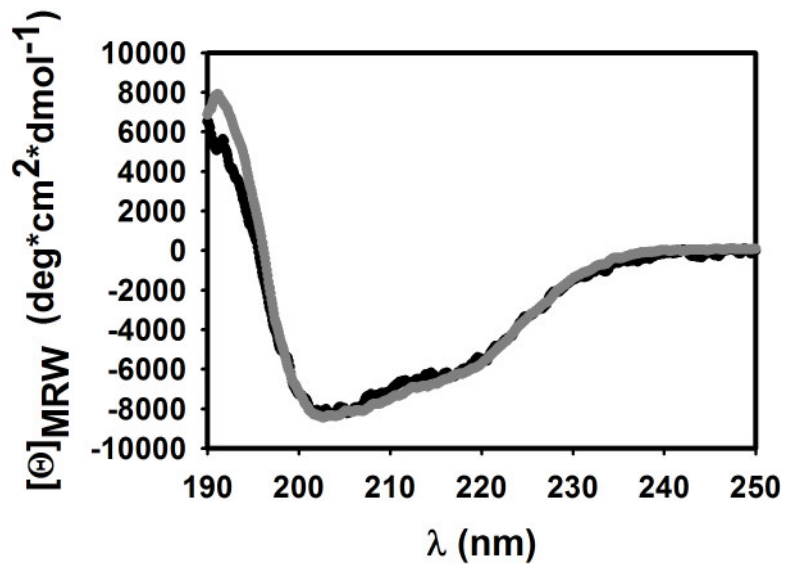

Supplemental Fig. 3: CD spectra of endo G DAGA and endo G N187K. Spectra were recorded at 20°C in a Jasco J710 instrument in a 0.1 mm cuvette. The buffer was 50 mM potassium phosphate, pH 7.5, 100 mM KCl, 10% glycerol. Protein concentrations were 0.45 mg/ml for endo G  $\Delta$ N53 DAGA (black curve) and 1.0 mg/ml for endo G  $\Delta$ N55 N187K (grey curve).

## Temme et al. Supplemental Fig. 4

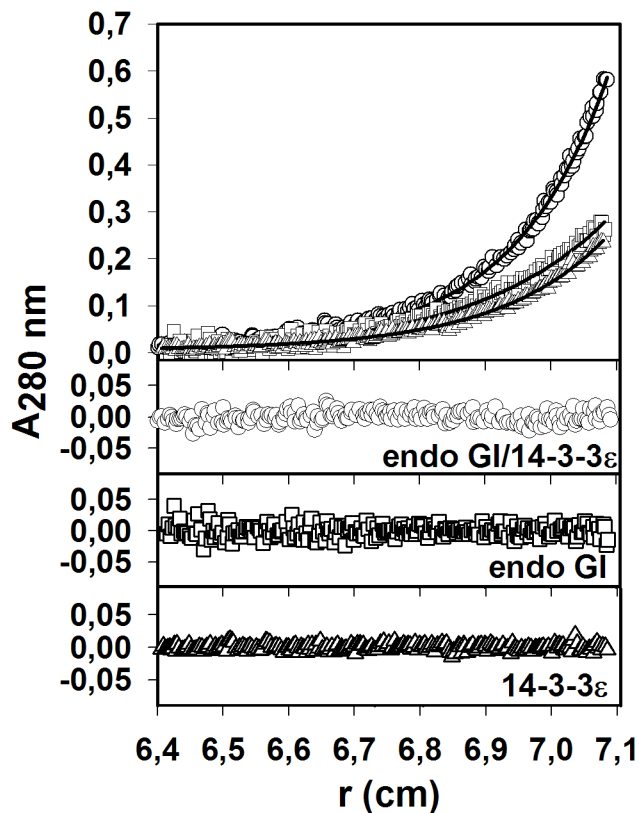

**Supplemental Fig. 4: Endo GI forms a low affinity complex with 14-3-3  $\epsilon$ .** Endo GI at a concentration of 1  $\mu\text{M}$  was incubated with 1  $\mu\text{M}$  dimeric 14-3-3  $\epsilon$ , and complex formation was monitored by analytical ultracentrifugation. The apparent molecular mass was calculated from equilibrium data analysed at 280 nm. As a control, the single proteins were measured at the same protein concentrations. The upper graph shows the experimental data (circle, endoGI/14-3-3  $\epsilon$ ; square, endo GI; triangle 14-3-3  $\epsilon$ ) and the respective fits (solid lines), the lower panels represent the deviation of the fits to the data. The molecular masses obtained were: endo GI/14-3-3  $\epsilon$ , 89.9 kDa, corresponding to complex formation of > 85 % (theoretical  $M_r$  = 101.7 kDa); endo GI, 45.4 kDa; 14-3-3  $\epsilon$ , 68.5 kDa.

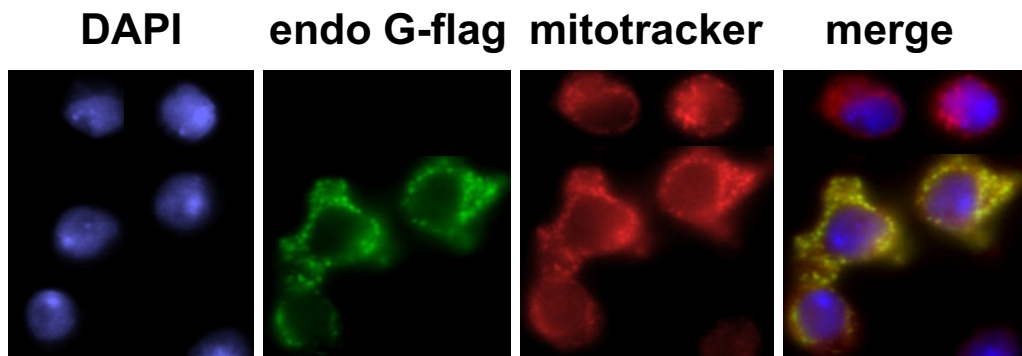

**Supplemental Fig. 5: Mitochondrial localization of endo G.** S2 cells were transiently transfected with an expression construct for endo G DAGA with a C-terminal flag-tag in the pMT/V5-His C vector . 48 hours after transfection, transcription of the endo G plasmid was induced by the addition of 0.5 mM copper sulfate. 24 hours later, cells were exposed to Mitotracker in fresh medium for 30 min and then fixed and stained as indicated. Cells shown here were assembled from two different microscopic images taken from the same sample.
